# Supplementary material for: Knowledge of Health Professionals Regarding Vegetarian Diets from Pregnancy to Adolescence: An Observational Study
Source: Nutrients. 2019 May 23;11(5):1149. doi: 10.3390/nu11051149 (PMC6566389; doi:10.3390/nu11051149)
Supplement: Supplementary file 1 [file nutrients-11-01149-s001.pdf]

## SOCIODEMOGRAPHIC CHARACTERISTICS

Indicate your professional profile even if you do not intend to give your consent

I don't agree Nurse Paediatric nurse Midwife Staff nurse Health care support workers

### Gender

Female Male

### Nationality

Italian  
Non-Italian

### Age (years)

20-24 35-39 50-54  
25-29 40-44 > 55  
30-34 45-49

### Education

High school diploma Degree

### Work experience (years)

0-4 15-19 30-34  
5-9 20-24 35-39  
10-14 25-29 >39

### Work experience in the maternal-child area

Obstetrics Neonatal Paediatric Community service

### Have you participated in a developmental nutrition course in the last 5 years?

Yes No

### Do parents ask you for information about their child's feeding or diet?

Never Rarely Often Always

Please indicate with an X which foods are part of your diet and how often you consume them

|                | More than once a week | Every 15 days | More than once a month |
|----------------|-----------------------|---------------|------------------------|
| Red meat       |                       |               |                        |
| Poultry        |                       |               |                        |
| Fish           |                       |               |                        |
| Dairy products |                       |               |                        |
| Eggs           |                       |               |                        |

### Do you consume honey?

Yes No

### Do you have paediatric-age children?

Yes No

If you have children, indicate with an X which foods are part of their diet and how often they consume them

|                | More than once a week | Every 15 days | More than once a month |
|----------------|-----------------------|---------------|------------------------|
| Red meat       |                       |               |                        |
| Poultry        |                       |               |                        |
| Fish           |                       |               |                        |
| Dairy products |                       |               |                        |
| Eggs           |                       |               |                        |

## KNOWLEDGE

### 1. Definition of a vegetarian diet:

*Multiple answers may be chosen*

- Exclusion of meat and fish
- Exclusion of meat, inclusion of eggs and dairy products
- Inclusion of eggs, dairy products, and small amounts of fish or poultry
- Exclusion of meat, fish and poultry, inclusion of dairy products and eggs

Exclusion of meat, fish, poultry and eggs, inclusion of dairy products  
Exclusion of meat, fish, poultry and dairy products, inclusion of eggs  
Don't know

**2. Definition of a vegan diet:**

*Mark only one answer*

Exclusion of meat, fish and eggs, inclusion of dairy products  
Exclusion of meat and fish, inclusion of honey  
Exclusion of meat, fish, eggs and dairy products, inclusion of honey  
Exclusion of meat, fish and poultry as well as eggs, dairy products and honey  
Don't know

**3. An animal-based diet provides more health benefits than a plant-based diet**

True    False    Don't know

**4. A 100% plant diet, compared to the intake of a mainly-plant diet, does not further reduce cardiovascular risk factors or the development of diabetes**

True    False    Don't know

**5. Many chronic diseases, such as cardiovascular diseases, type 2 diabetes, hypertension and some types of cancer, are**

More frequent in omnivores than in vegetarians  
More frequent in vegetarians than in omnivores  
Equally prevalent in omnivores and vegetarians  
Don't know

**6. A planned vegetarian diet is nutritionally adequate during pregnancy, breastfeeding, the first and second phases of childhood, and adolescence**

True    False    Don't know

**7. There is clear proof that the first 1000 days of life (from conception until the age of 2 years) are particularly critical to good development and healthy growth. A plant-based diet is able to satisfy the nutritional demands of an infant in the first 1000 days of life.**

True    False    Don't know

**8. A vegetarian/vegan mother is at greater risk of deficiency in**

*Mark only one answer*

Vitamin D  
Vitamin B12  
Vitamin A  
Don't know

**9. Planned vegetarian and vegan diets during pregnancy involve higher risks of pregnancy difficulties or birth defects**

True    False    Don't know

**10. The lacto-ovo vegetarian mother can breastfeed without supplementation**

True    False    Don't know

**11. The vegan mother can breastfeed without supplementation**

True    False    Don't know

**12. Children who follow a planned vegetarian diet have an adequate energy intake similar to that of omnivorous children**

True    False    Don't know

**13. During complementary feeding, the infant must receive a sufficient amount of**

*Mark only one answer*

Vitamin B12  
Vitamin B12, iron, zinc and folate  
Vitamin B12, Vitamin D, iron, zinc, folate, n-3 LCPUFA, protein and calcium  
Don't know

**14. A vegetarian or 100% plant diet represents a protective factor against the development of infant overweight**

True    False    Don't know

**15. What supplemental nutrient should not be missing in the diet of a vegetarian or vegan child?**

*Mark only one answer*

- Iron
- Calcium
- Zinc
- Vitamin B12
- Don't know

**16. A teenager who chooses a vegetarian diet is**

*Multiple answers may be selected*

- Potentially at risk of impulsive choices
- Potentially at risk of making ill-informed choices
- Potentially at risk for an eating disorder
- Don't know

**17. Plant proteins have less bioavailability than animal proteins**

True    False    Don't know

**18. In the first 2 years of life, the amount of fibre in the diet must be limited**

True    False    Don't know

**19. Iron is a critical nutrient only for vegetarian/vegan children under 2 years of age**

True    False    Don't know

**20. The sources that meet the calcium requirements are**

*Multiple answers may be selected*

- Breast milk
- Formula
- Increased fibre
- Low-calcium salt water
- Don't know

**21. Zinc has the following characteristics**

*Mark only one answer*

- Greater bioavailability in vegetarian diets
- Greater bioavailability in omnivorous diets
- Equal bioavailability in vegetarian diets and omnivorous diets
- Don't know

**22. Vitamin D levels appear to be influenced by diet and are lower in vegetarian children**

True    False    Don't know

**23. Long-chain omega-3 fatty acid levels are**

*Make only one answer*

- Lower in vegetarians and vegans
- Similar to those of omnivores for vegetarians and lower in vegans
- Lower in vegetarians, typically absent in vegans
- Don't know
